# Supplementary material for: N-oxide ligands for selective separations of lanthanides: insights from computation
Source: Royal Society of Chemistry journal article supplement (doi:10.1039/d2ra07029d), 2023-01-01
Supplement: d2ra07029d2.pdf [file d2ra07029d2.pdf]

*Electronic Supplementary Information for*

**N-oxide ligands for selective separations of lanthanides: Insights from  
computation**

Tongyu Liu,<sup>1</sup> Alexander S. Ivanov,<sup>2</sup> Ilja Popovs,<sup>2</sup> Santa Jansone-Popova,<sup>2</sup> and De-en Jiang<sup>3,4\*</sup>

<sup>1</sup>Department of Chemistry, University of California, Riverside, CA 92521, USA

<sup>2</sup>Chemical Sciences Division, Oak Ridge National Laboratory, 1 Bethel Valley Road, Oak Ridge,  
TN 37831, USA

<sup>3</sup>Department of Chemical and Biomolecular Engineering, Vanderbilt University, Nashville, TN  
37235, USA

<sup>4</sup>Department of Chemistry, Vanderbilt University, Nashville, TN 37235, USA

\*To whom correspondence should be addressed. E-mail: [de-en.jiang@vanderbilt.edu](mailto:de-en.jiang@vanderbilt.edu).

Table S1. Average distance between Ln(III) and N-donor in complexes

|                   |                                                  |                                                  |                                                  |                                                  |
|-------------------|--------------------------------------------------|--------------------------------------------------|--------------------------------------------------|--------------------------------------------------|
| Complexes         | [Eu( <b>1a</b> )](NO <sub>3</sub> ) <sub>3</sub> | [Eu( <b>2a</b> )](NO <sub>3</sub> ) <sub>3</sub> | [Eu( <b>2b</b> )](NO <sub>3</sub> ) <sub>3</sub> | [Eu( <b>2c</b> )](NO <sub>3</sub> ) <sub>3</sub> |
| Eu-N distance (Å) | 2.66                                             | 2.67                                             | 2.64                                             | 2.67                                             |
| Complexes         | [Lu( <b>1a</b> )](NO <sub>3</sub> ) <sub>3</sub> | [Lu( <b>2a</b> )](NO <sub>3</sub> ) <sub>3</sub> | [Lu( <b>2b</b> )](NO <sub>3</sub> ) <sub>3</sub> | [Lu( <b>2c</b> )](NO <sub>3</sub> ) <sub>3</sub> |
| Lu-N distance (Å) | 2.57                                             | 2.57                                             | 2.55                                             | 2.57                                             |

Table S2. NBO charges of N and O atoms in ligands **2a-2d**

|              |           |           |           |           |
|--------------|-----------|-----------|-----------|-----------|
|              | <b>2a</b> | <b>2b</b> | <b>2c</b> | <b>2d</b> |
| N (pyridine) | -0.43     | -0.43     | -0.44     | -0.44     |
| O (N-Oxide)  | -0.54     | -0.55     | -0.54     | -0.55     |

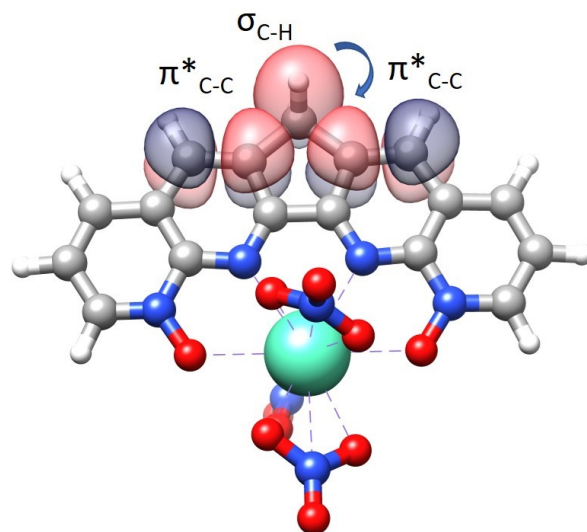

Figure S1. Natural bond orbital (NBO) analysis of the  $[\text{Eu}(\mathbf{2b})](\text{NO}_3)_3$  complex:  $\sigma_{\text{C-H}} \rightarrow \pi^*_{\text{C-C}}$  interactions characterized by the overlap of the C-H  $\sigma$ -bond orbitals with adjacent C=C  $\pi^*$  orbitals.

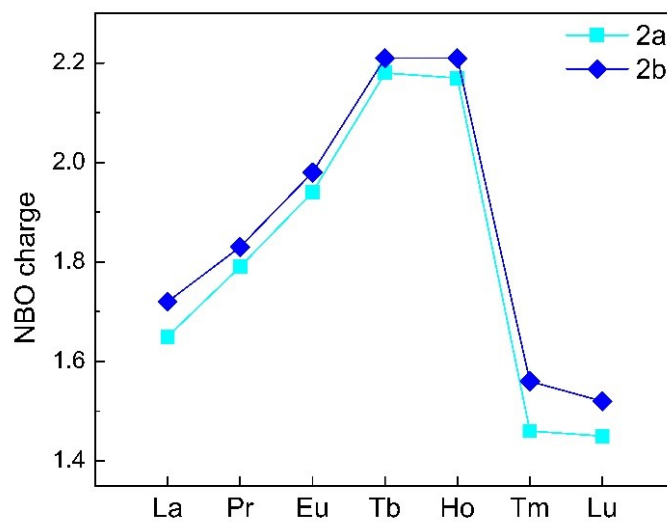

Figure S2. NBO charge on Ln in  $[\text{Ln}(\mathbf{2a})](\text{NO}_3)_3$  and  $[\text{Ln}(\mathbf{2b})](\text{NO}_3)_3$  complexes.

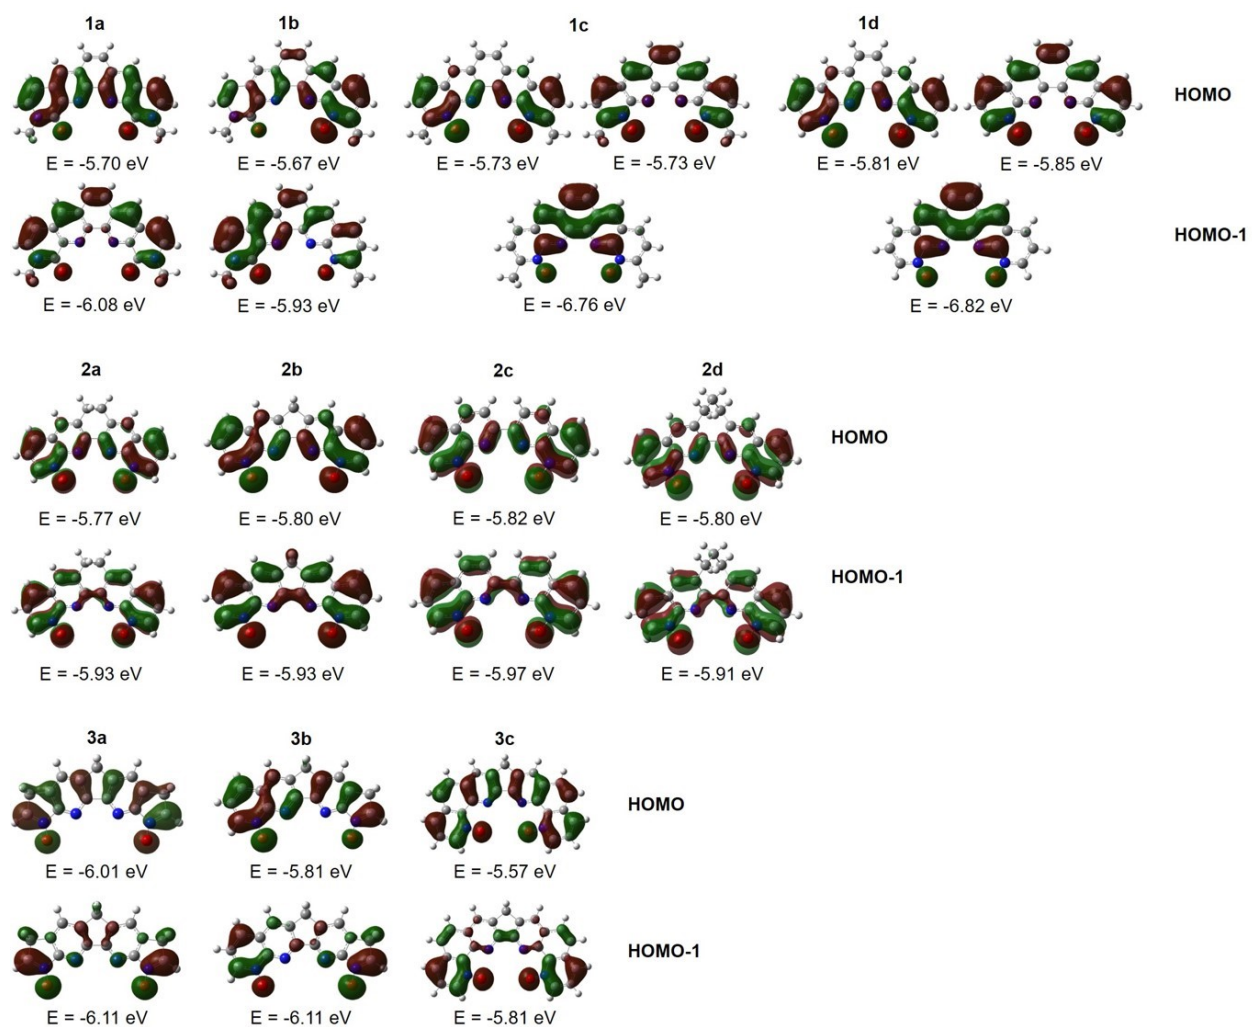

Figure S3. HOMO and HOMO-1 (isovalue = 0.02 a.u.) of all ligands and their energies.

## Sample Gaussian Input

```
#N B3LYP/gen gfinput pseudo=read scf=(MaxCycle=1000) integral=(grid=199302) opt=(maxcycle=999)  
freq scrf=(iefpcm,solvent=water) nosymm
```

*Ln-ligand*

0 1

.....

.....

C,H,N,O 0

6-31+G(d)

\*\*\*\*

*La 0*

S 3 1.00

5.0873990 -0.4172430

4.2709780 0.8860100

1.9154580 -1.4197520

S 1 1.00

0.5255960 1.0

S 1 1.00

0.2634740 1.0

S 1 1.00

0.0488200 1.0

S 1 1.00

0.0228360 1.0

P 3 1.00

3.0251610 0.5381960

2.3820950 -0.9816400

0.5844260 1.2395900

P 1 1.00

0.2603600 1.0

P 1 1.00

0.0833340 1.0

P 1 1.00

0.0302750 1.0

D 3 1.00

1.5768240 -0.0969440

0.5923900 0.4074660

0.2495000 0.7043630

D 1 1.00

0.1065130 1.0

D 1 1.00

0.0458310 1.0

\*\*\*\*

La 0

ECP46MWB 4 46

G-Komponente

1

2 1.000000 0.000000

S-G

2

2 3.309900 91.932177

2 1.655000 -3.788764

P-G

2

2 2.836800 63.759486

2 1.418400 -0.647958

D-G

2

2 2.021300 36.116173

2 1.010700 0.219114

F-G

1

2 4.028600 -36.010016

*Cartesian Coordinates for the La(1a)(NO<sub>3</sub>)<sub>3</sub> complex at B3LYP/LC/6-31+G(d);*

*E = -2012.99362831Hartree*

|   |             |             |             |
|---|-------------|-------------|-------------|
| O | 0.44385600  | 10.07006500 | 10.91927500 |
| C | 1.10622500  | 11.13706400 | 10.96536400 |
| N | 1.61463000  | 11.70250600 | 9.82799300  |
| C | 1.35805000  | 11.01604900 | 8.55039300  |
| H | 0.28156400  | 10.94547700 | 8.38065400  |
| H | 1.82288600  | 11.58847400 | 7.74896200  |
| O | -1.62025300 | 7.77698200  | 15.13977300 |
| C | -1.49886600 | 8.23977300  | 16.29859700 |
| N | -2.09081500 | 7.62502700  | 17.37006000 |
| C | -2.87519500 | 6.40670500  | 17.10683300 |
| H | -3.69883600 | 6.63912600  | 16.42794000 |
| H | -3.26842300 | 6.03453200  | 18.05192900 |
| O | 0.43915300  | 6.91221500  | 11.35621300 |
| N | -0.45538700 | 6.03394000  | 11.59866500 |
| O | -1.35549300 | 6.35135600  | 12.44485500 |
| O | -0.44667800 | 4.93242300  | 11.04450200 |
| O | 3.37151000  | 7.11655600  | 14.20535500 |
| N | 2.28952200  | 7.62740600  | 13.90891200 |
| O | 1.18653400  | 7.17978600  | 14.36873000 |
| O | 2.21473200  | 8.63356800  | 13.12783000 |
| O | -2.76066700 | 9.18846700  | 11.60036700 |
| N | -2.98291500 | 10.38510800 | 11.98181900 |
| O | -3.96085600 | 11.02070500 | 11.58581900 |
| O | -2.13858900 | 10.89644000 | 12.79492200 |
| C | 2.35321600  | 12.87599800 | 9.85623500  |
| C | 2.62264300  | 13.54532200 | 11.00711500 |
| C | 2.13307300  | 13.03284400 | 12.25205900 |
| C | 1.37579300  | 11.83174600 | 12.22543900 |
| C | 2.34607400  | 13.62898600 | 13.50683400 |
| H | 2.91773300  | 14.55016400 | 13.58027000 |
| C | 1.82253000  | 13.03767100 | 14.65898500 |
| C | 1.07806700  | 11.82500000 | 14.50897100 |
| N | 0.86759500  | 11.25301400 | 13.31990600 |
| C | 0.51383500  | 11.17944300 | 15.68310300 |
| C | 1.99750500  | 13.59691700 | 15.97978100 |
| H | 2.56817200  | 14.51578800 | 16.07731100 |

|    |             |             |             |
|----|-------------|-------------|-------------|
| C  | 1.46167300  | 12.99883000 | 17.07701900 |
| H  | 1.59724100  | 13.43365300 | 18.06293400 |
| C  | 0.69806700  | 11.77664000 | 16.97004700 |
| C  | 0.12074800  | 11.14391000 | 18.07297800 |
| H  | 0.23803800  | 11.56838900 | 19.06636400 |
| C  | -0.62084200 | 9.96321600  | 17.89776400 |
| C  | -0.73169000 | 9.45655400  | 16.57611100 |
| N  | -0.17329300 | 10.04391200 | 15.50794200 |
| C  | -1.27220300 | 9.24436100  | 18.95198100 |
| C  | -1.97435900 | 8.11900600  | 18.65971400 |
| La | -0.46216900 | 8.83084600  | 13.02299800 |
| H  | 3.20616900  | 14.45808400 | 10.97549300 |
| H  | 2.70169500  | 13.21989200 | 8.89062700  |
| H  | 1.78182600  | 10.00998500 | 8.58217200  |
| H  | -2.23617400 | 5.65022100  | 16.64655000 |
| H  | -2.48735900 | 7.54250900  | 19.41892800 |
| H  | -1.21257500 | 9.59181700  | 19.97672600 |

*Cartesian Coordinates for the La(1b)(NO<sub>3</sub>)<sub>3</sub> complex at B3LYP/LC/6-31+G(d);*

*E = -2012.93110219 Hartree*

|   |             |             |             |
|---|-------------|-------------|-------------|
| O | 0.43119800  | 10.06836600 | 10.92855600 |
| C | 1.10647000  | 11.12451400 | 10.98247400 |
| N | 1.61684100  | 11.69477500 | 9.84698400  |
| C | 1.34443400  | 11.02267000 | 8.56501700  |
| H | 0.26634900  | 10.97513400 | 8.39663200  |
| H | 1.81941200  | 11.59124800 | 7.76680200  |
| O | -1.54002700 | 7.82433700  | 15.13630400 |
| N | -1.47851300 | 8.29658000  | 16.36488700 |
| C | -2.09895400 | 7.64025100  | 17.36649000 |
| C | -2.84440900 | 6.39814300  | 17.01174800 |
| H | -3.62011000 | 6.61596300  | 16.26838900 |
| H | -3.30556600 | 5.96839900  | 17.90286500 |
| O | 0.35332900  | 6.81312200  | 11.40617900 |
| N | -0.54032700 | 5.95491600  | 11.71448300 |
| O | -1.39343900 | 6.30629000  | 12.59495800 |
| O | -0.57273300 | 4.83899600  | 11.18962400 |
| O | 3.51537300  | 7.12980800  | 13.91669500 |

|    |             |             |             |
|----|-------------|-------------|-------------|
| N  | 2.41890400  | 7.64769600  | 13.68612600 |
| O  | 1.36769400  | 7.29418800  | 14.32224700 |
| O  | 2.27801000  | 8.55543800  | 12.80570100 |
| O  | -2.74861900 | 9.19690300  | 11.65360000 |
| N  | -2.95408300 | 10.40050800 | 12.02443500 |
| O  | -3.92832700 | 11.04217200 | 11.62743100 |
| O  | -2.09943400 | 10.91040600 | 12.82573800 |
| C  | 2.36282300  | 12.86249100 | 9.88059200  |
| C  | 2.63714900  | 13.52529400 | 11.03417800 |
| C  | 2.14436700  | 13.01108000 | 12.27657700 |
| C  | 1.38524500  | 11.80988600 | 12.24766500 |
| C  | 2.35364500  | 13.60737500 | 13.53073500 |
| H  | 2.92855400  | 14.52632400 | 13.60571800 |
| C  | 1.81785300  | 13.02380100 | 14.68159200 |
| C  | 1.07144500  | 11.81206200 | 14.53059700 |
| N  | 0.87563700  | 11.23251800 | 13.34142200 |
| C  | 0.48547800  | 11.17974300 | 15.70285500 |
| C  | 1.98490400  | 13.59498300 | 15.99765500 |
| H  | 2.56073600  | 14.51076800 | 16.09202100 |
| C  | 1.43331000  | 13.00956100 | 17.09262900 |
| H  | 1.55999200  | 13.44915800 | 18.07747400 |
| C  | 0.66287400  | 11.79206000 | 16.98439900 |
| C  | 0.06954400  | 11.17375600 | 18.08400200 |
| H  | 0.17380700  | 11.60472300 | 19.07579200 |
| C  | -0.67154600 | 9.99058500  | 17.92020400 |
| C  | -0.76502100 | 9.47359500  | 16.59646200 |
| N  | -0.20880000 | 10.04618000 | 15.52765600 |
| C  | -1.32038200 | 9.29492100  | 18.97521400 |
| C  | -2.01687100 | 8.14830400  | 18.68675400 |
| La | -0.43967700 | 8.80892400  | 13.04531700 |
| H  | 3.22487300  | 14.43540400 | 11.00622000 |
| H  | 2.71210300  | 13.20972800 | 8.91641500  |
| H  | 1.74768000  | 10.00809300 | 8.58903200  |
| H  | -2.17092200 | 5.66186400  | 16.55801500 |
| H  | -2.52596300 | 7.59440400  | 19.46727900 |
| H  | -1.25959500 | 9.67605800  | 19.98928300 |



*Cartesian Coordinates for the La(1c)(NO<sub>3</sub>)<sub>3</sub> complex at B3LYP/LC/6-31+G(d);*

*E = -2012.86733197 Hartree*

|   |             |             |             |
|---|-------------|-------------|-------------|
| O | 0.41896400  | 10.09381600 | 11.00449200 |
| N | 1.12251300  | 11.20762200 | 11.00807700 |
| C | 1.59164300  | 11.70813100 | 9.84826200  |
| C | 1.27872200  | 10.95334300 | 8.60063400  |
| H | 0.19423600  | 10.86680400 | 8.46642900  |
| H | 1.71273300  | 11.45783400 | 7.73558400  |
| O | -1.60125500 | 7.86369500  | 15.10753400 |
| N | -1.48611000 | 8.30719100  | 16.34030500 |
| C | -2.09503000 | 7.64849300  | 17.34757900 |
| C | -2.88346100 | 6.43408400  | 16.99054500 |
| H | -3.67350600 | 6.68791600  | 16.27410400 |
| H | -3.33110400 | 5.99864700  | 17.88574400 |
| O | 0.43898000  | 6.89533000  | 11.36099700 |
| N | -0.43362400 | 6.00616400  | 11.63927400 |
| O | -1.32513100 | 6.32397800  | 12.49404500 |
| O | -0.41262500 | 4.89230500  | 11.10968000 |
| O | 3.40083100  | 7.13423400  | 14.21693300 |
| N | 2.31147300  | 7.63337900  | 13.92099800 |
| O | 1.21296000  | 7.15340200  | 14.35283100 |
| O | 2.22871800  | 8.66007100  | 13.16777000 |
| O | -2.75503900 | 9.17208600  | 11.58370000 |
| N | -2.98388800 | 10.37559500 | 11.94112900 |
| O | -3.94926800 | 11.00655000 | 11.50515800 |
| O | -2.16405800 | 10.89850500 | 12.76896200 |
| C | 2.35084200  | 12.90599000 | 9.86426300  |
| C | 2.62414000  | 13.57092000 | 11.03221900 |
| C | 2.13141400  | 13.04384600 | 12.25667200 |
| C | 1.36664000  | 11.84187400 | 12.22937700 |
| C | 2.34690000  | 13.62437100 | 13.51728000 |
| H | 2.92427200  | 14.54155500 | 13.59161400 |
| C | 1.82562600  | 13.02960200 | 14.66632100 |
| C | 1.07399200  | 11.82244900 | 14.50368200 |
| N | 0.85596900  | 11.25594500 | 13.31067400 |
| C | 0.50990800  | 11.17334900 | 15.67925100 |
| C | 2.01630300  | 13.58480100 | 15.98561100 |
| H | 2.59425000  | 14.49908200 | 16.07998200 |

|    |             |             |             |
|----|-------------|-------------|-------------|
| C  | 1.48538800  | 12.98379200 | 17.08096800 |
| H  | 1.62835600  | 13.40720800 | 18.07046100 |
| C  | 0.71418900  | 11.76820500 | 16.96450500 |
| C  | 0.14363400  | 11.13378000 | 18.06761000 |
| H  | 0.27215100  | 11.54908000 | 19.06314800 |
| C  | -0.60914400 | 9.96029800  | 17.90185300 |
| C  | -0.73694500 | 9.46348000  | 16.57235000 |
| N  | -0.18874400 | 10.04171300 | 15.50129900 |
| C  | -1.24341400 | 9.25939400  | 18.96279200 |
| C  | -1.96654800 | 8.13039400  | 18.67432100 |
| La | -0.46209400 | 8.82879800  | 13.01853700 |
| H  | 3.20874900  | 14.48498100 | 11.03523900 |
| H  | 2.71349000  | 13.27989800 | 8.91349400  |
| H  | 1.67176900  | 9.93188300  | 8.66223400  |
| H  | -2.24340600 | 5.68960900  | 16.50304200 |
| H  | -2.46667200 | 7.57351000  | 19.45851900 |
| H  | -1.15197200 | 9.62548300  | 19.98003600 |

*Cartesian Coordinates for the La(1d)(NO<sub>3</sub>)<sub>3</sub> complex at B3LYP/LC/6-31+G(d);*

*E = -1934.21848638 Hartree*

|   |             |             |             |
|---|-------------|-------------|-------------|
| O | 0.45195400  | 10.06053300 | 10.99801800 |
| N | 1.14298800  | 11.17911500 | 11.01271700 |
| C | 1.61866500  | 11.69667500 | 9.87433000  |
| H | 1.38641300  | 11.12668600 | 8.98377100  |
| O | -1.56172500 | 7.81460100  | 15.12327000 |
| N | -1.44549100 | 8.27362500  | 16.34746000 |
| C | -2.02665900 | 7.63036100  | 17.36805900 |
| H | -2.57241700 | 6.73825100  | 17.08846400 |
| O | 0.47084300  | 6.85736300  | 11.37193200 |
| N | -0.39360900 | 5.96387100  | 11.66325100 |
| O | -1.27949700 | 6.28223300  | 12.52434000 |
| O | -0.37027700 | 4.84741100  | 11.14099700 |
| O | 3.44736900  | 7.15533900  | 14.22352800 |
| N | 2.35267000  | 7.63875900  | 13.92366200 |
| O | 1.26007800  | 7.15686500  | 14.36955200 |
| O | 2.25631100  | 8.65036400  | 13.15171500 |
| O | -2.72511400 | 9.14574500  | 11.59153600 |

|    |             |             |             |
|----|-------------|-------------|-------------|
| N  | -2.95146000 | 10.34653000 | 11.95964200 |
| O  | -3.91879100 | 10.98129100 | 11.53509700 |
| O  | -2.12561200 | 10.86212300 | 12.78671700 |
| C  | 2.36445500  | 12.89053500 | 9.85942900  |
| C  | 2.62643600  | 13.56316400 | 11.03017200 |
| C  | 2.13104400  | 13.03193900 | 12.25136100 |
| C  | 1.37755400  | 11.82074300 | 12.23207200 |
| C  | 2.33401900  | 13.62138900 | 13.51262900 |
| H  | 2.90097500  | 14.54507900 | 13.58503400 |
| C  | 1.81368800  | 13.02754500 | 14.66102400 |
| C  | 1.07560200  | 11.81028300 | 14.50230800 |
| N  | 0.86913300  | 11.23464200 | 13.31410800 |
| C  | 0.51254400  | 11.16109400 | 15.67933600 |
| C  | 1.99017900  | 13.59187700 | 15.97928600 |
| H  | 2.55706400  | 14.51314700 | 16.07186300 |
| C  | 1.45999900  | 12.99164000 | 17.07502800 |
| H  | 1.59288100  | 13.42291400 | 18.06245200 |
| C  | 0.70322400  | 11.76567000 | 16.96340000 |
| C  | 0.13706800  | 11.13116900 | 18.06708700 |
| H  | 0.25613300  | 11.55369100 | 19.06060800 |
| C  | -0.60002000 | 9.94418000  | 17.90613600 |
| C  | -0.71418800 | 9.44233400  | 16.57552900 |
| N  | -0.17053700 | 10.02225000 | 15.50326900 |
| C  | -1.22257100 | 9.24340500  | 18.97360500 |
| C  | -1.92660300 | 8.09600500  | 18.69184700 |
| La | -0.43366300 | 8.78988100  | 13.01905300 |
| H  | 3.20153400  | 14.48299600 | 11.03696400 |
| H  | 2.72221500  | 13.25468100 | 8.90330600  |
| H  | -2.42089900 | 7.52665900  | 19.47044800 |
| H  | -1.13680600 | 9.62097000  | 19.98695300 |

*Cartesian Coordinates for the La(2a)(NO<sub>3</sub>)<sub>3</sub> complex at B3LYP/LC/6-31+G(d);*

*E = -1935.42839722 Hartree*

|    |             |             |             |
|----|-------------|-------------|-------------|
| La | 1.05020600  | -0.00441400 | -0.10938300 |
| O  | 0.85114100  | 2.53809800  | 0.08649100  |
| C  | -0.15754400 | 4.56877000  | -0.32321800 |
| N  | -0.23140600 | 3.23911600  | -0.17141300 |

|   |             |             |             |
|---|-------------|-------------|-------------|
| O | 1.02512300  | -2.54313800 | 0.22163400  |
| N | -1.44426200 | 1.26228800  | -0.09079200 |
| C | -1.46067000 | 2.58887000  | -0.26888500 |
| O | 0.26575700  | 0.19967600  | 2.45082100  |
| N | -1.36496100 | -1.42613800 | 0.16174600  |
| C | -2.63570400 | 3.34224300  | -0.53123200 |
| O | 2.34590000  | 0.72612300  | 2.09831300  |
| C | 0.12604600  | -4.61464100 | 0.67430800  |
| O | 1.51024400  | 0.89126500  | 4.11622800  |
| N | 4.13296400  | -0.00588600 | -0.63820700 |
| O | 3.54250400  | -1.03348500 | -0.16991900 |
| N | 1.08640700  | 0.03454300  | -3.24234800 |
| O | 5.34918900  | 0.00822100  | -0.84169100 |
| N | 1.37792300  | 0.61295100  | 2.92393500  |
| O | 3.40105700  | 1.01139300  | -0.88820200 |
| O | 1.47792100  | -0.99466400 | -2.59828500 |
| O | 1.10342400  | 0.07442000  | -4.47408100 |
| O | 0.67827700  | 1.02680900  | -2.54731600 |
| C | -3.84298300 | 2.60568000  | -0.61912400 |
| H | -4.76725700 | 3.13304000  | -0.83870200 |
| C | -3.84835100 | 1.23837700  | -0.42891300 |
| C | -2.60354900 | 0.60698400  | -0.13967700 |
| C | -2.56500400 | -0.84723800 | 0.13096100  |
| C | -3.78006200 | -1.55162800 | 0.37508300  |
| C | -5.08345700 | -0.78977300 | 0.41680400  |
| H | -5.23222500 | -0.41471000 | 1.43963500  |
| C | -5.08998800 | 0.38997500  | -0.56483100 |
| H | -5.13826400 | 0.00782700  | -1.59466900 |
| C | -3.69423400 | -2.90779100 | 0.61977000  |
| H | -4.59218200 | -3.48963600 | 0.80865900  |
| C | -2.43723800 | -3.56055300 | 0.64077200  |
| C | -1.30131300 | -2.74018000 | 0.40881000  |
| N | -0.02752400 | -3.30486900 | 0.43535800  |
| H | 0.83780000  | 4.98278500  | -0.22571400 |
| C | -1.29981400 | 5.34245400  | -0.58741800 |
| C | -2.53818200 | 4.74626900  | -0.69367100 |
| C | -2.25667100 | -4.94393700 | 0.88785000  |
| C | -0.97637300 | -5.45446700 | 0.90192700  |

|   |             |             |             |
|---|-------------|-------------|-------------|
| H | -0.78703700 | -6.50528800 | 1.08826300  |
| H | 1.15228500  | -4.95888300 | 0.67478300  |
| H | -3.11914900 | -5.57789000 | 1.06476600  |
| H | -3.42957900 | 5.33013700  | -0.89751600 |
| H | -5.98265000 | 1.00322700  | -0.41224800 |
| H | -5.91784500 | -1.46385400 | 0.20273500  |
| H | -1.17469100 | 6.41291100  | -0.70280000 |

*Cartesian Coordinates for the La(2b)(NO<sub>3</sub>)<sub>3</sub> complex at B3LYP/LC/6-31+G(d);*

*E = -1896.09473138 Hartree*

|    |             |             |             |
|----|-------------|-------------|-------------|
| La | 1.20823400  | -0.00157600 | 0.03023400  |
| O  | 0.92795100  | 2.69674700  | -0.17973500 |
| C  | -0.27769500 | 4.67151500  | -0.41193500 |
| N  | -0.21821400 | 3.33892300  | -0.27163800 |
| O  | 1.04497000  | -2.80153200 | 0.39882200  |
| N  | -1.22966400 | 1.29306400  | -0.06755400 |
| C  | -1.39957200 | 2.60805200  | -0.21096300 |
| O  | 0.38257200  | 0.78116400  | 2.46924000  |
| N  | -1.17153400 | -1.48985100 | 0.27763100  |
| C  | -2.67854100 | 3.23627500  | -0.28940200 |
| O  | 2.48652300  | 1.15225300  | 2.06519500  |
| C  | -0.07797900 | -4.82801600 | 0.59995300  |
| O  | 1.62150800  | 1.77305500  | 3.97917000  |
| N  | 4.26069000  | 0.00576000  | -0.50527100 |
| O  | 3.70118600  | -0.96447700 | 0.10576100  |
| N  | 1.24851200  | -0.31740200 | -3.09297400 |
| O  | 5.47108800  | 0.02021500  | -0.72856100 |
| N  | 1.50042800  | 1.24927700  | 2.87155500  |
| O  | 3.49984800  | 0.96488800  | -0.87586800 |
| O  | 1.82014000  | -1.18305900 | -2.35384300 |
| O  | 1.25942700  | -0.40114500 | -4.32209300 |
| O  | 0.66105300  | 0.65077800  | -2.49543300 |
| C  | -3.84379500 | 2.40323900  | -0.20677200 |
| H  | -4.82407800 | 2.86696000  | -0.26843700 |
| C  | -3.67197400 | 1.04304500  | -0.04738700 |
| C  | -2.33698600 | 0.58861700  | 0.01505600  |
| C  | -2.30760100 | -0.83315200 | 0.18716500  |

|   |             |             |             |
|---|-------------|-------------|-------------|
| C | -3.62203000 | -1.34508200 | 0.22932200  |
| C | -4.60024300 | -0.17183000 | 0.08454000  |
| C | -3.73546500 | -2.71296300 | 0.37615500  |
| H | -4.69525400 | -3.21982800 | 0.41900800  |
| C | -2.53609500 | -3.49543600 | 0.46678200  |
| C | -1.28418000 | -2.81220500 | 0.40885100  |
| N | -0.07152100 | -3.49201100 | 0.47324000  |
| H | 0.67925400  | 5.17615900  | -0.44898100 |
| C | -1.51330200 | 5.33763300  | -0.49909000 |
| C | -2.70762800 | 4.64542100  | -0.44049100 |
| C | -2.50737100 | -4.90625600 | 0.60150400  |
| C | -1.28502900 | -5.54698100 | 0.66638000  |
| H | -1.22399200 | -6.62465700 | 0.76728300  |
| H | 0.89876100  | -5.29282800 | 0.64188000  |
| H | -3.43530300 | -5.46665800 | 0.64905000  |
| H | -3.65793100 | 5.16504800  | -0.50635100 |
| H | -1.49724300 | 6.41567100  | -0.61207800 |
| H | -5.26097100 | -0.08516300 | 0.95495200  |
| H | -5.24325100 | -0.28675600 | -0.79587000 |

*Cartesian Coordinates for the La(2c)(NO<sub>3</sub>)<sub>3</sub> complex at B3LYP/LC/6-31+G(d);*

*E = -1857.99025441 Hartree*

|    |             |             |             |
|----|-------------|-------------|-------------|
| La | 1.10530500  | 0.13186400  | 0.02354800  |
| O  | 0.91511700  | 2.65996100  | 0.08448900  |
| C  | -0.10554700 | 4.71004700  | -0.13180400 |
| N  | -0.17894400 | 3.37330300  | -0.07395900 |
| O  | 1.10383500  | -2.23648900 | 0.88971300  |
| N  | -1.38815700 | 1.38865200  | -0.09343600 |
| C  | -1.40945000 | 2.72607400  | -0.18063600 |
| O  | 0.17704000  | 0.50875100  | 2.51460100  |
| N  | -1.26791200 | -1.27131800 | 0.23160800  |
| C  | -2.58380600 | 3.50288000  | -0.36658900 |
| O  | 2.34398200  | 0.37164100  | 2.41289600  |
| C  | 0.27849200  | -4.37647600 | 1.04786100  |
| O  | 1.36207800  | 0.65225900  | 4.35146900  |
| N  | 3.99246300  | -0.11786300 | -1.19626800 |
| O  | 3.59924900  | -0.84945900 | -0.22736000 |

|   |             |             |             |
|---|-------------|-------------|-------------|
| N | 0.47387500  | -0.75374200 | -2.91916200 |
| O | 5.12258900  | -0.23338600 | -1.67615600 |
| N | 1.29644900  | 0.51537700  | 3.12852600  |
| O | 3.15930100  | 0.73775100  | -1.64780500 |
| O | 1.02276100  | -1.53952100 | -2.07541200 |
| O | 0.28650100  | -1.08936800 | -4.08988200 |
| O | 0.12618500  | 0.39526300  | -2.48644700 |
| C | -3.79312600 | 2.77362100  | -0.47352400 |
| H | -4.72734700 | 3.30611600  | -0.62187700 |
| C | -3.77650400 | 1.40077800  | -0.38179000 |
| C | -2.54385900 | 0.72636100  | -0.18061300 |
| C | -2.47470400 | -0.75333800 | -0.01698000 |
| C | -3.63493700 | -1.56786600 | -0.08374000 |
| C | -3.52752100 | -2.92364300 | 0.12307500  |
| H | -4.40327300 | -3.56261700 | 0.06934500  |
| C | -2.26706600 | -3.49412600 | 0.42546900  |
| C | -1.17337500 | -2.58937800 | 0.47010300  |
| N | 0.09182500  | -3.07183100 | 0.80098600  |
| H | 0.89443500  | 5.11327900  | -0.03587000 |
| C | -1.25004800 | 5.50337200  | -0.31019800 |
| C | -2.49003500 | 4.91442300  | -0.43145800 |
| C | -2.05368000 | -4.86960600 | 0.68475700  |
| C | -0.77940900 | -5.29682300 | 0.98943700  |
| H | -0.56269600 | -6.33839700 | 1.19650500  |
| H | 1.29625400  | -4.64796800 | 1.29728100  |
| H | -2.88813900 | -5.56168900 | 0.64418800  |
| H | -3.38619600 | 5.50891800  | -0.57412800 |
| H | -1.12492200 | 6.57910100  | -0.35157900 |
| H | -4.70686400 | 0.85484900  | -0.45819100 |
| H | -4.60481700 | -1.13963700 | -0.29609400 |

*Cartesian Coordinates for the La(2d)(NO<sub>3</sub>)<sub>3</sub> complex at B3LYP/LC/6-31+G(d);*

*E = -1974.73098908 Hartree*

|    |             |            |             |
|----|-------------|------------|-------------|
| La | 0.97787200  | 0.02048700 | -0.11728300 |
| O  | 0.70730400  | 2.50210100 | 0.50662900  |
| C  | -0.25632200 | 4.54142600 | 0.01383600  |
| N  | -0.33869400 | 3.20957300 | 0.13297500  |

|   |             |             |             |
|---|-------------|-------------|-------------|
| O | 0.99708800  | -2.52241900 | -0.04124200 |
| N | -1.54848100 | 1.23406600  | 0.06119600  |
| C | -1.54092600 | 2.55720400  | -0.13393800 |
| O | 0.25093900  | -0.32872600 | 2.43583900  |
| N | -1.41427100 | -1.45802000 | 0.08218800  |
| C | -2.66146300 | 3.29723900  | -0.58787500 |
| O | 2.27650600  | 0.42272600  | 2.18994700  |
| C | 0.18001600  | -4.61261300 | 0.47965300  |
| O | 1.47158300  | 0.10714200  | 4.20250800  |
| N | 4.04630200  | 0.18886000  | -0.67718900 |
| O | 3.48509500  | -0.92342000 | -0.40780100 |
| N | 1.00573000  | 0.64849300  | -3.19560200 |
| O | 5.25517000  | 0.26703800  | -0.90782200 |
| N | 1.33778300  | 0.06785900  | 2.97921400  |
| O | 3.29379600  | 1.22127200  | -0.69686100 |
| O | 1.56551400  | -0.40633000 | -2.75259700 |
| O | 1.01272600  | 0.93438200  | -4.39416900 |
| O | 0.43674100  | 1.40456800  | -2.33403800 |
| C | -3.80196300 | 2.53310600  | -0.93848700 |
| H | -4.65830000 | 3.04137200  | -1.37297800 |
| C | -3.82445600 | 1.16032500  | -0.77178200 |
| C | -2.66929300 | 0.55661100  | -0.18144700 |
| C | -2.61799200 | -0.89079000 | 0.17261700  |
| C | -3.77238100 | -1.59157100 | 0.64674100  |
| C | -3.63254100 | -2.94566100 | 0.88857600  |
| H | -4.48158200 | -3.52461700 | 1.24106700  |
| C | -2.38525500 | -3.59534000 | 0.72621400  |
| C | -1.29814900 | -2.76353800 | 0.35471600  |
| N | -0.01832400 | -3.30553400 | 0.26191100  |
| H | 0.71261200  | 4.96182900  | 0.25093600  |
| C | -1.35721700 | 5.30977600  | -0.40233000 |
| C | -2.55597600 | 4.70467800  | -0.71541100 |
| C | -2.15919100 | -4.97521100 | 0.95665100  |
| C | -0.87926900 | -5.46906900 | 0.82230200  |
| H | -0.65504700 | -6.51671200 | 0.98662400  |
| H | 1.20694400  | -4.93947500 | 0.37827400  |
| H | -2.98581800 | -5.61885500 | 1.23923300  |
| H | -3.40660200 | 5.28341300  | -1.06024500 |



|   |             |             |             |
|---|-------------|-------------|-------------|
| H | -1.22738900 | 6.38297400  | -0.48180400 |
| C | -4.95970100 | 0.31133500  | -1.29747600 |
| C | -5.05078500 | -0.85931600 | 0.98775200  |
| C | -5.85207900 | -0.33012500 | -0.21711900 |
| H | -6.41922300 | -1.14470600 | -0.68159900 |
| H | -6.57934900 | 0.40084000  | 0.15419400  |
| H | -4.52271500 | -0.48462600 | -1.91438600 |
| H | -5.57566500 | 0.91766700  | -1.96877600 |
| H | -4.78888300 | -0.01323600 | 1.63643800  |
| H | -5.68641600 | -1.51954200 | 1.58573100  |

*Cartesian Coordinates for the La(3a)(NO<sub>3</sub>)<sub>3</sub> complex at B3LYP/LC/6-31+G(d);*

*E = -1819.84807277 Hartree*

|    |             |             |             |
|----|-------------|-------------|-------------|
| La | 1.77267300  | -0.32827800 | 0.33734200  |
| O  | 0.25352500  | 4.36822600  | 0.06431400  |
| N  | -1.00810400 | 4.41518700  | -0.18342900 |
| O  | 1.18627300  | -2.72172300 | 0.92940800  |
| N  | -1.36210100 | 2.00799700  | -0.01715200 |
| C  | -1.83538100 | 3.21908800  | -0.22585300 |
| O  | 0.95651500  | -0.29479600 | 2.94637700  |
| N  | -0.95810500 | -1.02336400 | 0.33342500  |
| C  | -3.15303600 | 3.59644000  | -0.51179700 |
| O  | 3.01519900  | -0.91569200 | 2.61846200  |
| O  | 2.19099300  | -0.90900200 | 4.64783300  |
| N  | 4.42293800  | -1.15348600 | -1.09054200 |
| O  | 3.88303000  | -1.85620700 | -0.16893700 |
| N  | 0.86458400  | -0.71288600 | -2.62978400 |
| O  | 5.46148900  | -1.50885500 | -1.64751700 |
| N  | 2.05666300  | -0.70977900 | 3.43931700  |
| O  | 3.82829400  | -0.06908400 | -1.40351400 |
| O  | 1.23098800  | -1.67535500 | -1.86809500 |
| O  | 0.56222900  | -0.90643100 | -3.80799400 |
| O  | 0.82647200  | 0.44494700  | -2.10369300 |
| C  | -4.12272500 | 2.60097800  | -0.58551900 |
| H  | -5.16481400 | 2.82634200  | -0.79454500 |
| C  | -3.67637900 | 1.29449600  | -0.37046200 |
| C  | -2.30922500 | 1.05995900  | -0.10472600 |

|   |             |             |             |
|---|-------------|-------------|-------------|
| C | -2.11580000 | -0.38099700 | 0.07737100  |
| C | -3.36871400 | -1.02642100 | -0.05132700 |
| C | -4.44202800 | -0.00738100 | -0.35762300 |
| C | -3.47298400 | -2.40940100 | 0.10611200  |
| H | -4.42296100 | -2.92744900 | 0.01209400  |
| C | -2.28711800 | -3.08358100 | 0.39515900  |
| C | -1.12271000 | -2.32771800 | 0.48338300  |
| N | -0.02197900 | -3.19559200 | 0.77987600  |
| H | -4.92804900 | -0.20939000 | -1.32112200 |
| H | -5.23458300 | -0.00934200 | 0.40184400  |
| C | -1.75847000 | 5.46595800  | -0.43091000 |
| C | -3.18994200 | 5.09214400  | -0.66891500 |
| H | -1.32115800 | 6.45477100  | -0.44513700 |
| H | -3.52909600 | 5.40206400  | -1.66726200 |
| H | -3.86134200 | 5.57578900  | 0.05400800  |
| C | -1.91321600 | -4.52099100 | 0.64853800  |
| C | -0.43376000 | -4.43200000 | 0.87808900  |
| H | -2.42196000 | -4.94760900 | 1.52378800  |
| H | -2.14245700 | -5.17982300 | -0.19995400 |
| H | 0.25803000  | -5.23205400 | 1.10396900  |

*Cartesian Coordinates for the La(3b)(NO<sub>3</sub>)<sub>3</sub> complex at B3LYP/LC/6-31+G(d);*

*E = -1857.97368932 Hartree*

|    |             |             |             |
|----|-------------|-------------|-------------|
| La | 1.50970400  | -0.03428800 | 0.19082500  |
| O  | 0.57582800  | 3.99377200  | 0.06147700  |
| N  | -0.68827200 | 4.13304500  | -0.13041500 |
| O  | 1.25788500  | -2.45896800 | 0.89577800  |
| N  | -1.18785200 | 1.75116500  | -0.01722500 |
| C  | -1.58694200 | 2.99709900  | -0.17248200 |
| O  | 0.48206500  | 0.19438300  | 2.67019600  |
| N  | -0.93691600 | -1.18914500 | 0.28309900  |
| C  | -2.89420600 | 3.45692800  | -0.39459400 |
| O  | 2.58419000  | -0.35862600 | 2.65236500  |
| C  | 0.17237300  | -4.49872900 | 0.94554000  |
| O  | 1.52123900  | -0.18825800 | 4.55984800  |
| N  | 4.28440200  | -0.59581400 | -1.13277400 |
| O  | 3.83317400  | -1.23320200 | -0.11775300 |

|   |             |             |             |
|---|-------------|-------------|-------------|
| N | 0.68815900  | -0.85467700 | -2.72385500 |
| O | 5.37560100  | -0.87471000 | -1.63106800 |
| N | 1.53100800  | -0.11783500 | 3.32910400  |
| O | 3.54848500  | 0.33313500  | -1.59877100 |
| O | 1.28422300  | -1.65524500 | -1.92882600 |
| O | 0.41899300  | -1.17250700 | -3.88372300 |
| O | 0.37994900  | 0.28966100  | -2.25166700 |
| C | -3.93180700 | 2.53187700  | -0.46682000 |
| H | -4.96125000 | 2.83611300  | -0.63268500 |
| C | -3.56507500 | 1.19022600  | -0.30802000 |
| C | -2.20936800 | 0.88071500  | -0.09649900 |
| C | -2.07505500 | -0.55443900 | 0.05800600  |
| C | -3.35863900 | -1.15865600 | -0.04720800 |
| C | -4.39530600 | -0.08091300 | -0.30492900 |
| C | -3.44525700 | -2.52057000 | 0.09850900  |
| H | -4.38850100 | -3.05409000 | 0.02400900  |
| C | -2.24976300 | -3.25473600 | 0.37285000  |
| C | -1.03383700 | -2.51957400 | 0.46109500  |
| N | 0.15263100  | -3.16934400 | 0.76425600  |
| C | -2.20855400 | -4.65601300 | 0.56651900  |
| C | -0.99908400 | -5.26245600 | 0.84517300  |
| H | -0.92604500 | -6.33270800 | 0.99985300  |
| H | 1.14470300  | -4.91366500 | 1.17812000  |
| H | -3.12295800 | -5.23620100 | 0.49738900  |
| H | -4.91211700 | -0.23407000 | -1.26067800 |
| H | -5.16705100 | -0.06282700 | 0.47455200  |
| C | -1.38234900 | 5.23522300  | -0.31387500 |
| C | -2.84246200 | 4.95690700  | -0.50166000 |
| H | -0.88639100 | 6.19604300  | -0.31600900 |
| H | -3.20378700 | 5.32128500  | -1.47330800 |
| H | -3.45236700 | 5.45329000  | 0.26578000  |

*Cartesian Coordinates for the La(3c)(NO<sub>3</sub>)<sub>3</sub> complex at B3LYP/LC/6-31+G(d);*

*E = -2203.38581695 Hartree*

|   |             |            |             |
|---|-------------|------------|-------------|
| C | -0.66225400 | 1.26195700 | -0.28482300 |
| C | -1.11664500 | 2.57249700 | -0.56796200 |
| C | 1.23186300  | 2.60384800 | -0.52006000 |

|   |             |             |             |
|---|-------------|-------------|-------------|
| C | 0.80847800  | 1.27187800  | -0.29040200 |
| C | 2.57739100  | 2.86199900  | -0.46833100 |
| C | 3.46336400  | 1.79609100  | -0.18264500 |
| C | 2.94816900  | 0.46255000  | -0.02810100 |
| N | 1.60334900  | 0.22445400  | -0.08970500 |
| C | 4.85300700  | 2.08671300  | -0.00079800 |
| C | 5.72329600  | 1.11641800  | 0.37768900  |
| C | 5.28404300  | -0.23793400 | 0.53242000  |
| C | 3.92282800  | -0.58218000 | 0.26913700  |
| N | -1.43850000 | 0.21343700  | -0.03529800 |
| C | -2.78933400 | 0.40753800  | -0.05322300 |
| C | -3.34000400 | 1.67958900  | -0.42605800 |
| C | -2.47100400 | 2.77188300  | -0.66445200 |
| C | -3.73226800 | -0.65740100 | 0.25684000  |
| C | -5.12624300 | -0.46526400 | 0.02186100  |
| C | -5.60597700 | 0.81133400  | -0.41949500 |
| C | -4.75112200 | 1.85200900  | -0.59649500 |
| H | 2.97783500  | 3.86232300  | -0.60823300 |
| H | 5.18560700  | 3.11174600  | -0.13461800 |
| H | 6.76918900  | 1.34057000  | 0.56159700  |
| H | -2.89180500 | 3.73909500  | -0.92575600 |
| H | -6.67263800 | 0.92937000  | -0.58194900 |
| H | -5.11853600 | 2.82859900  | -0.89746500 |
| C | 0.04910700  | 3.51541800  | -0.74412500 |
| H | 0.02262500  | 4.34056700  | -0.02155500 |
| H | 0.06482200  | 3.96794300  | -1.74388900 |
| N | -3.34777000 | -1.86825800 | 0.81216000  |
| C | -4.23006800 | -2.86686900 | 1.02505300  |
| C | -5.58349100 | -2.72507700 | 0.73779200  |
| C | -6.03932700 | -1.51530600 | 0.25303200  |
| C | 6.20975900  | -1.22541500 | 0.92957100  |
| C | 5.80445800  | -2.53947300 | 1.04849700  |
| C | 4.49484000  | -2.86606600 | 0.71770100  |
| N | 3.60583500  | -1.93114300 | 0.31899100  |
| O | -2.11147000 | -2.08346000 | 1.22022800  |
| H | -3.79095200 | -3.75712900 | 1.45491100  |
| H | -6.25038300 | -3.55871800 | 0.92556300  |
| H | -7.09391000 | -1.35421400 | 0.05440800  |

|    |             |             |             |
|----|-------------|-------------|-------------|
| H  | 7.23505000  | -0.93595100 | 1.13553200  |
| H  | 6.48067900  | -3.32676300 | 1.36109600  |
| H  | 4.10056800  | -3.87341100 | 0.71920900  |
| O  | 2.43873100  | -2.38130400 | -0.08153000 |
| La | 0.01099900  | -2.13565600 | -0.06329400 |
| O  | 0.60631800  | -1.25191500 | 2.41839600  |
| O  | 0.39517000  | -3.41121600 | 2.30130600  |
| O  | 0.81383600  | -2.46361200 | 4.23178900  |
| N  | -0.38608600 | -4.98158800 | -1.33612500 |
| O  | -0.99012700 | -4.63391500 | -0.26838700 |
| N  | -1.36774400 | -1.52864500 | -2.83666100 |
| O  | -0.57524100 | -6.08490500 | -1.85658800 |
| N  | 0.61005800  | -2.37859700 | 3.01656300  |
| O  | 0.42215200  | -4.13453900 | -1.84304900 |
| O  | -1.93869600 | -2.23263000 | -1.93985000 |
| O  | -1.89364100 | -1.33099300 | -3.93559500 |
| O  | -0.22919200 | -1.03518100 | -2.54302200 |
